# Supplementary material for: Bacillus velezensis and Paenibacillus peoriae Strains Effective as Biocontrol Agents against Xanthomonas Bacterial Spot
Source: MDPI journal article supplement (doi:10.3390/applmicrobiol3030076), 2023-09-14
Supplement: s1 [file s1]

# Supplementary Materials

**Table S1.** Characteristics of the most active bacterial isolates against *Xanthomonas perforans* T4.

| N                                                                                   | Bacterial isolate                                            | Environmental sample                                                | Medium   | Diameter of growth inhibition zone (including well diameter) *, mm |
|-------------------------------------------------------------------------------------|--------------------------------------------------------------|---------------------------------------------------------------------|----------|--------------------------------------------------------------------|
| <b>Phylum Firmicutes, Class Bacilli, Order Bacilliales, Family Paenibacillaceae</b> |                                                              |                                                                     |          |                                                                    |
| 1                                                                                   | <i>Paenibacillus polymyxa</i> T1B                            | Soil from vegetable garden (pepper) of INRS, Laval, (Québec), 2011  | TSA      | 29                                                                 |
| 2                                                                                   | <i>Paenibacillus polymyxa</i> 44                             | Lettuce leaves, Sherrington (Québec), 2011                          | R2A      | 25                                                                 |
| 3                                                                                   | <i>Paenibacillus polymyxa</i> 62                             | Soil of rhizosphere from lettuce, Sherrington (Québec), 2011        | R2A      | 19                                                                 |
| 4                                                                                   | <i>Paenibacillus peoriae</i> 273                             | Soil of rhizosphere, Sherrington (Québec), 2011                     | Benedict | 30                                                                 |
| 5                                                                                   | <i>Paenibacillus polymyxa</i> 329                            | Soil from tomato field of INRS, Laval, (Québec), 2011               | TSA      | 30                                                                 |
| 6                                                                                   | <i>Paenibacillus polymyxa</i> 344                            | Dead lettuce plants, Sherrington (Québec), 2011                     | TSA      | 29                                                                 |
| 7                                                                                   | <i>Paenibacillus polymyxa</i> 390                            | Stems and leaves of lettuce plants, Sherrington (Québec), 2011      | Benedict | 32                                                                 |
| 8                                                                                   | <i>Paenibacillus peoriae</i> To99                            | Soil from onion field, Laval (Québec), 2012                         | TSA      | 30                                                                 |
| 9                                                                                   | <i>Paenibacillus polymyxa</i> TP12                           | Soil from pepper field, Laval (Québec), 2012                        | PCA      | 26                                                                 |
| 10                                                                                  | <i>Paenibacillus polymyxa</i> TP29                           |                                                                     | TSA      | 28                                                                 |
| 11                                                                                  | <i>Paenibacillus polymyxa</i> TP77                           |                                                                     | TSA      | 23                                                                 |
| 12                                                                                  | <i>Paenibacillus polymyxa</i> V25T                           | Soil from tomato field, Laval (Québec), 2012                        | PCA      | 27                                                                 |
| 13                                                                                  | <i>Paenibacillus polymyxa</i> TFr60                          | Soil from strawberry field, Laval (Québec), 2012                    | TSA      | 24                                                                 |
| 14                                                                                  | <i>Paenibacillus peoriae</i> TFr101                          | Soil from strawberry field, Laval (Québec), 2012                    | TSA      | 32                                                                 |
| 15                                                                                  | <i>Paenibacillus polymyxa</i> TAU1                           | Soil from eggplant field, Laval (Québec), 2012                      | TSA      | 25                                                                 |
| 16                                                                                  | <i>Paenibacillus polymyxa</i> TM54                           | Soil from corn field, Laval (Québec), 2012                          | TSA      | 24                                                                 |
| <b>Phylum Firmicutes, Class Bacilli, Order Bacilliales, Family Bacillaceae</b>      |                                                              |                                                                     |          |                                                                    |
| 1                                                                                   | <i>Bacillus amyloliquefaciens</i> subsp. <i>plantarum</i> 16 | Soil of rhizosphere from lettuce garden, Sherrington (Québec), 2011 | R2A      | 16                                                                 |
| 2                                                                                   | <i>Bacillus amyloliquefaciens</i> subsp. <i>plantarum</i> 33 | Stems and leaves of lettuce plants, Sherrington (Québec), 2011      | R2A      | 19                                                                 |
| 3                                                                                   | <i>Bacillus velezensis</i> 71                                | Soil of rhizosphere from lettuce garden, Sherrington (Québec), 2011 | R2A      | 25                                                                 |

|   |                                                                  |                                                                 |     |    |
|---|------------------------------------------------------------------|-----------------------------------------------------------------|-----|----|
| 4 | <i>Bacillus amyloliquefaciens</i><br>subsp. <i>plantarum</i> 237 | Mud from a river, Rivière des<br>Prairies, Laval (Québec), 2012 | R2A | 21 |
| 5 | <i>Bacillus amyloliquefaciens</i><br>subsp. <i>plantarum</i> 335 | Dead lettuce plants,<br>Sherrington (Québec), 2011              | TSA | 18 |
| 6 | <i>Bacillus velezensis</i> VFb49                                 | Soil from raspberry field, Laval<br>(Québec), 2012              | TSA | 20 |

Non-selective media: R2A, Tryptic Soy Agar (TSA), Plate Count Agar (PCA). Selective media: *Burkholderia cepacia*-Selective Agar (BCSA), Benedict Agar (for *Streptomyces* species). The diameter values were obtained from experiments performed in triplicate and are expressed as the mean of three replicates. \* Diameter of well was 10 mm.

**Table S2.** Activity of bacterial supernatants against plant pathogens.

| <b>Bacterial strains</b>   | Diameter (mm) of growth inhibition zone (including well diameter) * |                        |
|----------------------------|---------------------------------------------------------------------|------------------------|
|                            | <i>B. velezensis</i> 71                                             | <i>P. peoriae</i> To99 |
| <i>X. campestris</i> 901   | 34                                                                  | 31                     |
| <i>X. perforans</i> T4     | 31                                                                  | 30                     |
| <i>X. euvesicatoria</i> R4 | 25                                                                  | 26                     |
| <i>X. gardneri</i> DC00T7A | 24                                                                  | 34                     |

\* Diameter of well was 10 mm.

**Table S3.** Interspecies and inter-strains antibacterial activity of cell-free supernatants.

| Bacterial strains       | Diameter (mm) of growth inhibition zone (including well diameter)<br>* |                        |
|-------------------------|------------------------------------------------------------------------|------------------------|
|                         | <i>B. velezensis</i> 71                                                | <i>P. peoriae</i> To99 |
| <i>B. velezensis</i> 71 | 10*                                                                    | 27                     |
| <i>P. peoriae</i> To99  | 25                                                                     | 37                     |

\* Diameter of well was 10 mm.

**Table S4.** AntiSMASH results for *B. velezensis*. 71.

| Region    | Type                         | From      | To        | Most similar known cluster               |            | Similarity |
|-----------|------------------------------|-----------|-----------|------------------------------------------|------------|------------|
| Region 1  | other                        | 9362      | 50,780    | <u>Bacilysin</u>                         | other      | 100%       |
| Region 2  | transAT-PKS-like             | 50,782    | 109,997   | <u>Bacillaene</u>                        | other      | 21%        |
| Region 3  | NRPS,transAT-PKS,betalactone | 171,684   | 266,737   | <u>Bacillomycin</u>                      | NRPS       | 100%       |
| Region 4  | PKS-like,transAT-PKS         | 278,660   | 359,310   | <u>Difficidin</u>                        | other      | 46%        |
| Region 5  | NRPS                         | 515,094   | 561,050   | <u>Surfactin</u>                         | NRPS       | 13%        |
| Region 6  | NRPS                         | 1,131,903 | 1,183,314 | <u>Plipastatin</u>                       | NRPS       | 53%        |
| Region 7  | transAT-PKS-like,NRPS        | 1,246,395 | 1,316,391 | <u>Difficidin</u>                        | other      | 26%        |
| Region 8  | NRPS                         | 1,317,955 | 1,369,179 | <u>Fengycin</u>                          | other-nrps | 20%        |
| Region 9  | NRPS                         | 2,218,675 | 2,267,383 | <u>Surfactin</u>                         | NRPS       | 8%         |
| Region 10 | NRPS                         | 2,592,538 | 2,637,326 | <u>Bacillibactin</u>                     | NRPS       | 23%        |
| Region 11 | terpene                      | 2,775,181 | 2,795,309 |                                          |            |            |
| Region 12 | bacteriocin,NRPS,transAT-PKS | 2,969,825 | 3,070,244 | <u>Macrolactin</u>                       | other      | 100%       |
| Region 13 | transAT-PKS,NRPS,T3PKS       | 3,289,256 | 3,447,842 | <u>Bacillaene</u>                        | other      | 85%        |
| Region 14 | terpene                      | 3,537,947 | 3,558,687 |                                          |            |            |
| Region 15 | transAT-PKS-like             | 3,637,553 | 3,703,170 | <u>Difficidin</u>                        | other      | 53%        |
| Region 16 | LAP                          | 3,726,271 | 3,748,453 | <u>Plantathiazolicin / plantazolicin</u> | lap        | 91%        |
| Region 17 | NRPS                         | 3,870,653 | 3,915,807 | <u>Surfactin</u>                         | NRPS       | 43%        |

**Table S5.** AntiSMASH results for *P. peoriae*. To99.

| Region    | Type                               | From      | To        | Most similar known cluster |                      | Similarity |
|-----------|------------------------------------|-----------|-----------|----------------------------|----------------------|------------|
|           | NRPS                               | 48,617    | 91,509    | <u>Glycopeptidolipid</u>   | NRPS                 | 7%         |
| Region 2  | lassopeptide,NRPS,<br>phosphonate  | 93,005    | 175,460   | <u>Paeninodin</u>          | other                | 40%        |
| Region 3  | transAT-PKS                        | 448,334   | 527,269   | <u>Bacillaene</u>          | other                | 28%        |
| Region 4  | NRPS                               | 549,888   | 603,754   | <u>Tridecaptin</u>         | NRPS                 | 80%        |
| Region 5  | NRPS,T1PKS                         | 770,792   | 825,230   | <u>Octapeptin C4</u>       | NRPS                 | 23%        |
| Region 6  | NRPS                               | 945,907   | 989,595   |                            |                      |            |
| Region 7  | NRPS,transAT-<br>PKS,siderophore   | 1,071,474 | 1,133,644 |                            |                      |            |
| Region 8  | NRPS                               | 1,467,577 | 1,509,456 | <u>Mycosubtilin</u>        | nrps-<br>transatpks  | 30%        |
| Region 9  | PKS-like,transAT-<br>PKS-like,NRPS | 1,763,531 | 1,814,509 | <u>Nosperin</u>            | t1pks+transa<br>tpks | 46%        |
| Region 10 | NRPS                               | 2,016,595 | 2,057,199 | <u>S-layer glycan</u>      | saccharide           | 33%        |
| Region 11 | NRPS                               | 2,201,220 | 2,244,306 |                            |                      |            |
| Region 12 | NRPS                               | 2,681,852 | 2,721,371 |                            |                      |            |
| Region 13 | NRPS                               | 2,941,495 | 2,990,122 | <u>Polymyxin</u>           | NRPS                 | 100%       |
| Region 14 | transAT-PKS-like                   | 3,149,043 | 3,190,282 |                            |                      |            |
| Region 15 | lanthipeptide                      | 3,628,198 | 3,651,308 |                            |                      |            |
| Region 16 | transAT-PKS-<br>like,NRPS          | 3,736,414 | 3,786,286 | <u>BD-12</u>               | NRPS                 | 7%         |
| Region 17 | phosphonate                        | 3,849,497 | 3,890,396 |                            |                      |            |
| Region 18 | NRPS-like                          | 4,031,462 | 4,074,699 |                            |                      |            |
| Region 19 | NRPS                               | 4,694,560 | 4,749,073 | <u>Bacillomycin</u>        | NRPS                 | 20%        |
| Region 20 | NRPS                               | 5,045,246 | 5,108,493 | <u>Paenibacterin</u>       | NRPS                 | 60%        |
| Region 21 | NRPS                               | 5,210,773 | 5,259,537 |                            |                      |            |
| Region 22 | bacteriocin                        | 5,353,775 | 5,364,011 |                            |                      |            |
| Region 23 | NRPS,transAT-PKS                   | 5,403,180 | 5,552,316 | <u>Brevicidine</u>         | NRPS                 | 18%        |
| Region 24 | NRPS                               | 5,585,963 | 5,626,142 |                            |                      |            |
| Region 25 | NRPS                               | 5,809,076 | 5,877,745 | <u>Fusaricidin</u>         | NRPS                 | 100%       |
| Region 26 | NRPS                               | 5,900,489 | 5,941,706 | <u>Surfactin</u>           | NRPS                 | 8%         |

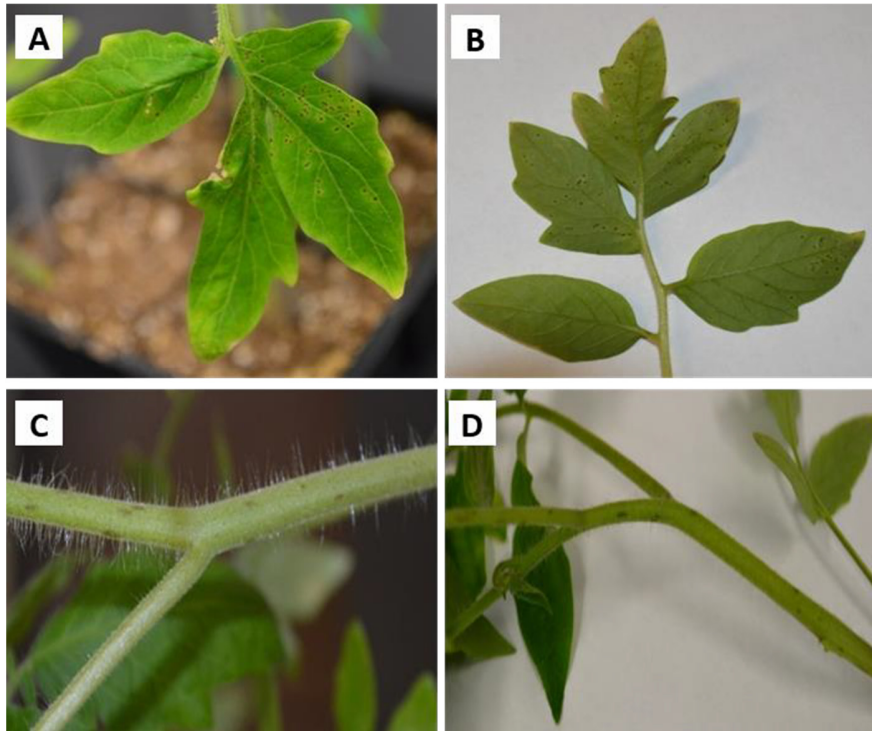

**Figure S1.** Symptoms caused by *X. gardneri* DC00T7A on tomato leaves surfaces, adaxial (A) and abaxial (B) and stems (C, D).

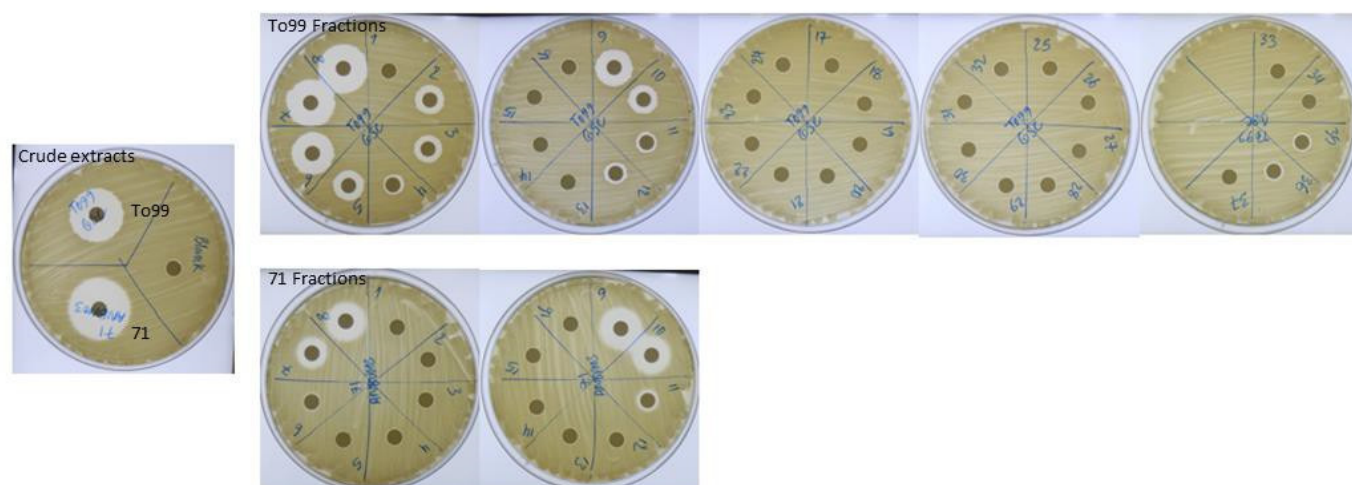

**Figure S2.** Testing the activity of crude extract fractions of *B. velezensis* 71 and *P. peoriae* To99 cultures obtained from Semi-preparative HPLC fractionation against *X. perforans* T4 by disk diffusion assay .
